# Supplementary material
Source: publisher figshare collection journal article supplement (https://gsapubs.figshare.com/ndownloader/files/22743278)
Supplement: Supplementary file 1 [file 22743278]

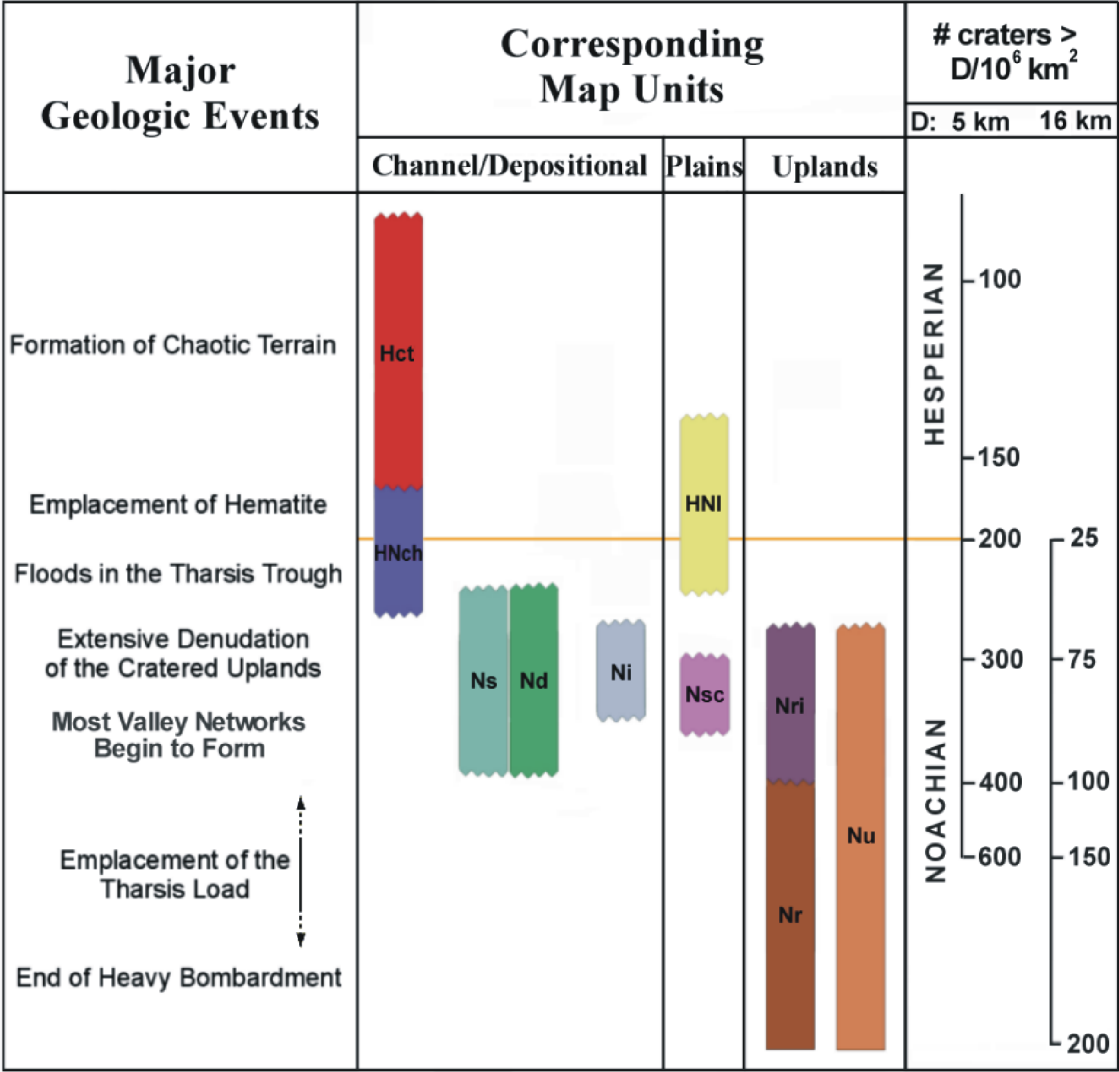

Figure 5. Summary of major geologic events and correlation of map units within Margaritifer Sinus region. Map units are described in Figure 2. Map relationships as well as normalized total and superposed crater counts were used to constrain the time of formation of each geomorphic unit. Spread in specific ages reflects the age spread of subunits within each single geomorphic unit. Orange line signifies the Noachian-Hesperian boundary. D=crater diameter(km).
